# Supplementary material for: Rare-Earth Oxides as Alternative High-Energy Photon Protective Fillers in HDPE Composites: Theoretical Aspects
Source: MDPI journal article supplement (doi:10.3390/polym13121930), 2021-06-10
Supplement: s1 [file s1]

# Supporting Information

**Table 1.** Mass attenuation coefficients ( $\mu_m$ ) of HDPE composites at photon energies of 0.001–5 MeV.

| Photon energy (MeV). | $\mu_m$ (cm <sup>2</sup> /g) |
|----------------------|------------------------------|
| 1.00E-03             | 1.89E+03                     |
| 1.04E-03             | 1.70E+03                     |
| 1.08E-03             | 1.52E+03                     |
| 1.08E-03             | 1.52E+03                     |
| 1.09E-03             | 1.48E+03                     |
| 1.11E-03             | 1.43E+03                     |
| 1.11E-03             | 1.43E+03                     |
| 1.25E-03             | 1.00E+03                     |
| 1.42E-03             | 7.03E+02                     |
| 1.42E-03             | 7.03E+02                     |
| 1.50E-03             | 6.00E+02                     |
| 1.54E-03             | 5.56E+02                     |
| 1.54E-03             | 5.56E+02                     |
| 1.63E-03             | 4.73E+02                     |
| 1.72E-03             | 4.02E+02                     |
| 1.72E-03             | 4.02E+02                     |
| 2.00E-03             | 2.59E+02                     |
| 3.00E-03             | 7.74E+01                     |
| 4.00E-03             | 3.24E+01                     |
| 5.00E-03             | 1.64E+01                     |
| 6.00E-03             | 9.43E+00                     |
| 6.72E-03             | 6.70E+00                     |
| 6.72E-03             | 6.70E+00                     |
| 7.01E-03             | 5.90E+00                     |
| 7.31E-03             | 5.19E+00                     |
| 7.31E-03             | 5.19E+00                     |
| 7.52E-03             | 4.77E+00                     |
| 7.74E-03             | 4.39E+00                     |
| 7.74E-03             | 4.39E+00                     |
| 8.00E-03             | 3.98E+00                     |
| 1.00E-02             | 2.09E+00                     |
| 1.50E-02             | 7.46E-01                     |
| 2.00E-02             | 4.32E-01                     |
| 3.00E-02             | 2.71E-01                     |
| 4.00E-02             | 2.28E-01                     |
| 4.68E-02             | 2.13E-01                     |
| 4.68E-02             | 2.13E-01                     |
| 5.00E-02             | 2.08E-01                     |
| 6.00E-02             | 1.97E-01                     |
| 8.00E-02             | 1.82E-01                     |
| 1.00E-01             | 1.72E-01                     |
| 1.50E-01             | 1.53E-01                     |
| 2.00E-01             | 1.40E-01                     |
| 3.00E-01             | 1.22E-01                     |
| 4.00E-01             | 1.09E-01                     |
| 5.00E-01             | 9.95E-02                     |
| 6.00E-01             | 9.20E-02                     |
| 8.00E-01             | 8.08E-02                     |
| 1.00E+00             | 7.26E-02                     |
| 1.02E+00             | 7.19E-02                     |
| 1.25E+00             | 6.50E-02                     |
| 1.50E+00             | 5.91E-02                     |
| 2.00E+00             | 5.06E-02                     |

|          |          |
|----------|----------|
| 2.04E+00 | 5.01E-02 |
| 3.00E+00 | 4.05E-02 |
| 4.00E+00 | 3.44E-02 |
| 5.00E+00 | 3.05E-02 |

**Table 2.** Mass attenuation coefficients ( $\mu_m$ ) of Sm<sub>2</sub>O<sub>3</sub>/HDPE composites at filler contents of 20, 40, and 60 wt.% and photon energies of 0.001–5 MeV.

| Photon energy (MeV) | Content (wt.%) |          |          |
|---------------------|----------------|----------|----------|
|                     | 20             | 40       | 60       |
| 1.00E-03            | 2.01E+03       | 2.12E+03 | 2.23E+03 |
| 1.04E-03            | 1.81E+03       | 1.92E+03 | 2.04E+03 |
| 1.08E-03            | 1.64E+03       | 1.75E+03 | 1.86E+03 |
| 1.08E-03            | 1.76E+03       | 1.99E+03 | 2.23E+03 |
| 1.09E-03            | 1.93E+03       | 2.38E+03 | 2.83E+03 |
| 1.11E-03            | 2.20E+03       | 2.97E+03 | 3.74E+03 |
| 1.11E-03            | 2.41E+03       | 3.39E+03 | 4.38E+03 |
| 1.25E-03            | 1.90E+03       | 2.80E+03 | 3.70E+03 |
| 1.42E-03            | 1.52E+03       | 2.34E+03 | 3.15E+03 |
| 1.42E-03            | 1.66E+03       | 2.62E+03 | 3.57E+03 |
| 1.50E-03            | 1.45E+03       | 2.29E+03 | 3.14E+03 |
| 1.54E-03            | 1.36E+03       | 2.15E+03 | 2.95E+03 |
| 1.54E-03            | 1.41E+03       | 2.26E+03 | 3.11E+03 |
| 1.63E-03            | 1.23E+03       | 1.99E+03 | 2.74E+03 |
| 1.72E-03            | 1.07E+03       | 1.75E+03 | 2.42E+03 |
| 1.72E-03            | 1.11E+03       | 1.81E+03 | 2.51E+03 |
| 2.00E-03            | 7.65E+02       | 1.27E+03 | 1.78E+03 |
| 3.00E-03            | 2.74E+02       | 4.70E+02 | 6.67E+02 |
| 4.00E-03            | 1.30E+02       | 2.27E+02 | 3.24E+02 |
| 5.00E-03            | 7.24E+01       | 1.28E+02 | 1.84E+02 |
| 6.00E-03            | 4.48E+01       | 8.01E+01 | 1.16E+02 |
| 6.72E-03            | 3.33E+01       | 5.99E+01 | 8.65E+01 |
| 6.72E-03            | 8.07E+01       | 1.55E+02 | 2.29E+02 |
| 7.01E-03            | 7.23E+01       | 1.39E+02 | 2.05E+02 |
| 7.31E-03            | 6.49E+01       | 1.25E+02 | 1.84E+02 |
| 7.31E-03            | 8.66E+01       | 1.68E+02 | 2.49E+02 |
| 7.52E-03            | 8.08E+01       | 1.57E+02 | 2.33E+02 |
| 7.74E-03            | 7.53E+01       | 1.46E+02 | 2.17E+02 |
| 7.74E-03            | 8.63E+01       | 1.68E+02 | 2.50E+02 |
| 8.00E-03            | 7.94E+01       | 1.55E+02 | 2.30E+02 |
| 1.00E-02            | 4.49E+01       | 8.78E+01 | 1.31E+02 |
| 1.50E-02            | 1.55E+01       | 3.03E+01 | 4.51E+01 |
| 2.00E-02            | 7.31E+00       | 1.42E+01 | 2.11E+01 |
| 3.00E-02            | 2.58E+00       | 4.89E+00 | 7.20E+00 |
| 4.00E-02            | 1.29E+00       | 2.35E+00 | 3.40E+00 |
| 4.68E-02            | 9.03E-01       | 1.59E+00 | 2.28E+00 |
| 4.68E-02            | 3.80E+00       | 7.38E+00 | 1.10E+01 |
| 5.00E-02            | 3.23E+00       | 6.26E+00 | 9.28E+00 |
| 6.00E-02            | 2.07E+00       | 3.95E+00 | 5.82E+00 |
| 8.00E-02            | 1.05E+00       | 1.92E+00 | 2.78E+00 |
| 1.00E-01            | 6.42E-01       | 1.11E+00 | 1.58E+00 |
| 1.50E-01            | 3.04E-01       | 4.54E-01 | 6.04E-01 |
| 2.00E-01            | 2.05E-01       | 2.70E-01 | 3.35E-01 |
| 3.00E-01            | 1.40E-01       | 1.58E-01 | 1.76E-01 |
| 4.00E-01            | 1.15E-01       | 1.21E-01 | 1.27E-01 |
| 5.00E-01            | 1.01E-01       | 1.03E-01 | 1.05E-01 |
| 6.00E-01            | 9.17E-02       | 9.14E-02 | 9.12E-02 |
| 8.00E-01            | 7.90E-02       | 7.72E-02 | 7.54E-02 |
| 1.00E+00            | 7.04E-02       | 6.82E-02 | 6.59E-02 |

|          |          |          |          |
|----------|----------|----------|----------|
| 1.02E+00 | 6.96E-02 | 6.73E-02 | 6.51E-02 |
| 1.25E+00 | 6.26E-02 | 6.03E-02 | 5.80E-02 |
| 1.50E+00 | 5.69E-02 | 5.48E-02 | 5.26E-02 |
| 2.00E+00 | 4.91E-02 | 4.75E-02 | 4.59E-02 |
| 2.04E+00 | 4.85E-02 | 4.70E-02 | 4.54E-02 |
| 3.00E+00 | 4.00E-02 | 3.96E-02 | 3.92E-02 |
| 4.00E+00 | 3.50E-02 | 3.55E-02 | 3.60E-02 |
| 5.00E+00 | 3.17E-02 | 3.30E-02 | 3.43E-02 |

**Table 3.** Mass attenuation coefficients ( $\mu_m$ ) of Eu<sub>2</sub>O<sub>3</sub>/HDPE composites at filler contents of 20, 40, and 60 wt.% and photon energies of 0.001–5 MeV.

| Photon energy (MeV) | Content (wt.%) |          |          |
|---------------------|----------------|----------|----------|
|                     | 20             | 40       | 60       |
| 1.00E-03            | 2.02E+03       | 2.15E+03 | 2.28E+03 |
| 1.06E-03            | 1.72E+03       | 1.85E+03 | 1.98E+03 |
| 1.13E-03            | 1.47E+03       | 1.59E+03 | 1.72E+03 |
| 1.13E-03            | 1.57E+03       | 1.79E+03 | 2.02E+03 |
| 1.15E-03            | 1.73E+03       | 2.17E+03 | 2.61E+03 |
| 1.16E-03            | 2.01E+03       | 2.77E+03 | 3.53E+03 |
| 1.16E-03            | 2.20E+03       | 3.15E+03 | 4.11E+03 |
| 1.31E-03            | 1.75E+03       | 2.62E+03 | 3.49E+03 |
| 1.48E-03            | 1.41E+03       | 2.20E+03 | 2.99E+03 |
| 1.48E-03            | 1.55E+03       | 2.47E+03 | 3.39E+03 |
| 1.50E-03            | 1.49E+03       | 2.39E+03 | 3.28E+03 |
| 1.61E-03            | 1.25E+03       | 2.01E+03 | 2.77E+03 |
| 1.61E-03            | 1.30E+03       | 2.11E+03 | 2.92E+03 |
| 1.70E-03            | 1.14E+03       | 1.86E+03 | 2.58E+03 |
| 1.80E-03            | 9.96E+02       | 1.64E+03 | 2.28E+03 |
| 1.80E-03            | 1.03E+03       | 1.70E+03 | 2.37E+03 |
| 2.00E-03            | 7.93E+02       | 1.33E+03 | 1.86E+03 |
| 3.00E-03            | 2.85E+02       | 4.92E+02 | 7.00E+02 |
| 4.00E-03            | 1.35E+02       | 2.38E+02 | 3.42E+02 |
| 5.00E-03            | 7.56E+01       | 1.35E+02 | 1.94E+02 |
| 6.00E-03            | 4.69E+01       | 8.43E+01 | 1.22E+02 |
| 6.98E-03            | 3.16E+01       | 5.71E+01 | 8.27E+01 |
| 6.98E-03            | 7.65E+01       | 1.47E+02 | 2.18E+02 |
| 7.29E-03            | 6.84E+01       | 1.32E+02 | 1.95E+02 |
| 7.62E-03            | 6.11E+01       | 1.18E+02 | 1.74E+02 |
| 7.62E-03            | 8.16E+01       | 1.59E+02 | 2.36E+02 |
| 8.00E-03            | 7.24E+01       | 1.41E+02 | 2.09E+02 |
| 8.05E-03            | 7.12E+01       | 1.38E+02 | 2.06E+02 |
| 8.05E-03            | 8.16E+01       | 1.59E+02 | 2.37E+02 |
| 1.00E-02            | 4.73E+01       | 9.24E+01 | 1.38E+02 |
| 1.50E-02            | 1.63E+01       | 3.19E+01 | 4.75E+01 |
| 2.00E-02            | 7.70E+00       | 1.50E+01 | 2.22E+01 |
| 3.00E-02            | 2.72E+00       | 5.16E+00 | 7.61E+00 |
| 4.00E-02            | 1.35E+00       | 2.47E+00 | 3.59E+00 |
| 4.85E-02            | 8.74E-01       | 1.54E+00 | 2.20E+00 |
| 4.85E-02            | 3.63E+00       | 7.05E+00 | 1.05E+01 |
| 5.00E-02            | 3.37E+00       | 6.53E+00 | 9.69E+00 |
| 6.00E-02            | 2.16E+00       | 4.12E+00 | 6.08E+00 |
| 8.00E-02            | 1.09E+00       | 2.00E+00 | 2.91E+00 |
| 1.00E-01            | 6.67E-01       | 1.16E+00 | 1.66E+00 |
| 1.50E-01            | 3.12E-01       | 4.71E-01 | 6.30E-01 |
| 2.00E-01            | 2.09E-01       | 2.78E-01 | 3.47E-01 |
| 3.00E-01            | 1.41E-01       | 1.61E-01 | 1.81E-01 |
| 4.00E-01            | 1.16E-01       | 1.23E-01 | 1.30E-01 |
| 5.00E-01            | 1.02E-01       | 1.04E-01 | 1.06E-01 |

|          |          |          |          |
|----------|----------|----------|----------|
| 6.00E-01 | 9.20E-02 | 9.21E-02 | 9.21E-02 |
| 8.00E-01 | 7.92E-02 | 7.76E-02 | 7.60E-02 |
| 1.00E+00 | 7.05E-02 | 6.84E-02 | 6.63E-02 |
| 1.02E+00 | 6.97E-02 | 6.76E-02 | 6.55E-02 |
| 1.25E+00 | 6.27E-02 | 6.05E-02 | 5.83E-02 |
| 1.50E+00 | 5.70E-02 | 5.50E-02 | 5.29E-02 |
| 2.00E+00 | 4.91E-02 | 4.76E-02 | 4.61E-02 |
| 2.04E+00 | 4.86E-02 | 4.71E-02 | 4.57E-02 |
| 3.00E+00 | 4.01E-02 | 3.98E-02 | 3.94E-02 |
| 4.00E+00 | 3.50E-02 | 3.56E-02 | 3.62E-02 |
| 5.00E+00 | 3.18E-02 | 3.32E-02 | 3.46E-02 |

**Table 4.** Mass attenuation coefficients ( $\mu_m$ ) of Gd<sub>2</sub>O<sub>3</sub>/HDPE composites at filler contents of 20, 40, and 60 wt.% and photon energies of 0.001–5 MeV.

| Photon energy (MeV) | Content (wt.%) |          |          |
|---------------------|----------------|----------|----------|
|                     | 20             | 40       | 60       |
| 1.00E-03            | 2.03E+03       | 2.18E+03 | 2.32E+03 |
| 1.06E-03            | 1.63E+03       | 1.77E+03 | 1.91E+03 |
| 1.13E-03            | 1.31E+03       | 1.44E+03 | 1.57E+03 |
| 1.13E-03            | 1.34E+03       | 1.50E+03 | 1.66E+03 |
| 1.15E-03            | 1.45E+03       | 1.77E+03 | 2.09E+03 |
| 1.16E-03            | 1.64E+03       | 2.18E+03 | 2.73E+03 |
| 1.16E-03            | 1.78E+03       | 2.47E+03 | 3.16E+03 |
| 1.31E-03            | 1.40E+03       | 2.19E+03 | 2.99E+03 |
| 1.48E-03            | 1.30E+03       | 2.04E+03 | 2.78E+03 |
| 1.48E-03            | 1.42E+03       | 2.29E+03 | 3.16E+03 |
| 1.50E-03            | 1.27E+03       | 2.06E+03 | 2.85E+03 |
| 1.61E-03            | 1.14E+03       | 1.85E+03 | 2.56E+03 |
| 1.61E-03            | 1.19E+03       | 1.94E+03 | 2.70E+03 |
| 1.70E-03            | 1.04E+03       | 1.71E+03 | 2.39E+03 |
| 1.80E-03            | 9.11E+02       | 1.51E+03 | 2.11E+03 |
| 1.80E-03            | 9.39E+02       | 1.57E+03 | 2.20E+03 |
| 2.00E-03            | 8.09E+02       | 1.36E+03 | 1.91E+03 |
| 3.00E-03            | 2.92E+02       | 5.06E+02 | 7.21E+02 |
| 4.00E-03            | 1.39E+02       | 2.46E+02 | 3.53E+02 |
| 5.00E-03            | 7.78E+01       | 1.39E+02 | 2.01E+02 |
| 6.00E-03            | 4.83E+01       | 8.71E+01 | 1.26E+02 |
| 6.98E-03            | 2.95E+01       | 5.36E+01 | 7.77E+01 |
| 6.98E-03            | 7.14E+01       | 1.37E+02 | 2.04E+02 |
| 7.29E-03            | 6.35E+01       | 1.22E+02 | 1.81E+02 |
| 7.62E-03            | 5.65E+01       | 1.09E+02 | 1.61E+02 |
| 7.62E-03            | 7.55E+01       | 1.47E+02 | 2.18E+02 |
| 8.00E-03            | 7.41E+01       | 1.44E+02 | 2.14E+02 |
| 8.05E-03            | 6.61E+01       | 1.29E+02 | 1.91E+02 |
| 8.05E-03            | 7.57E+01       | 1.48E+02 | 2.20E+02 |
| 1.00E-02            | 4.86E+01       | 9.50E+01 | 1.42E+02 |
| 1.50E-02            | 1.68E+01       | 3.29E+01 | 4.90E+01 |
| 2.00E-02            | 7.94E+00       | 1.54E+01 | 2.29E+01 |
| 3.00E-02            | 2.80E+00       | 5.33E+00 | 7.86E+00 |
| 4.00E-02            | 1.39E+00       | 2.55E+00 | 3.71E+00 |
| 4.85E-02            | 8.42E-01       | 1.48E+00 | 2.11E+00 |
| 4.85E-02            | 8.34E-01       | 1.46E+00 | 2.09E+00 |
| 5.00E-02            | 3.41E+00       | 6.60E+00 | 9.80E+00 |
| 6.00E-02            | 2.20E+00       | 4.21E+00 | 6.21E+00 |
| 8.00E-02            | 1.12E+00       | 2.05E+00 | 2.99E+00 |
| 1.00E-01            | 6.81E-01       | 1.19E+00 | 1.70E+00 |
| 1.50E-01            | 3.17E-01       | 4.81E-01 | 6.45E-01 |
| 2.00E-01            | 2.12E-01       | 2.83E-01 | 3.54E-01 |

|          |          |          |          |
|----------|----------|----------|----------|
| 3.00E-01 | 1.42E-01 | 1.62E-01 | 1.83E-01 |
| 4.00E-01 | 1.16E-01 | 1.23E-01 | 1.30E-01 |
| 5.00E-01 | 1.02E-01 | 1.04E-01 | 1.06E-01 |
| 6.00E-01 | 9.20E-02 | 9.20E-02 | 9.20E-02 |
| 8.00E-01 | 7.91E-02 | 7.74E-02 | 7.57E-02 |
| 1.00E+00 | 7.04E-02 | 6.82E-02 | 6.60E-02 |
| 1.02E+00 | 6.96E-02 | 6.74E-02 | 6.51E-02 |
| 1.25E+00 | 6.26E-02 | 6.03E-02 | 5.79E-02 |
| 1.50E+00 | 5.69E-02 | 5.47E-02 | 5.25E-02 |
| 2.00E+00 | 4.90E-02 | 4.74E-02 | 4.58E-02 |
| 2.04E+00 | 4.85E-02 | 4.69E-02 | 4.54E-02 |
| 3.00E+00 | 4.00E-02 | 3.96E-02 | 3.92E-02 |
| 4.00E+00 | 3.50E-02 | 3.55E-02 | 3.60E-02 |
| 5.00E+00 | 3.18E-02 | 3.31E-02 | 3.44E-02 |

**Table 5.** Comparative  $\mu_m$ ,  $\mu$ , and HVL values of Sm<sub>2</sub>O<sub>3</sub>/HDPE, Eu<sub>2</sub>O<sub>3</sub>/HDPE, and Gd<sub>2</sub>O<sub>3</sub>/HDPE composites with other common Pb-free HDPE composites (Bi<sub>2</sub>O<sub>3</sub>/HDPE, WO<sub>3</sub>/HDPE, and Fe<sub>2</sub>O<sub>3</sub>/HDPE) at filler contents of 20, 40, and 60 wt.% and photons energies of 0.1, 0.5, 1, and 5 MeV.

| Parameter                    | Photon energy (MeV) | Content (wt.%) | Sm <sub>2</sub> O <sub>3</sub> | Eu <sub>2</sub> O <sub>3</sub> | Gd <sub>2</sub> O <sub>3</sub> | WO <sub>3</sub> | Bi <sub>2</sub> O <sub>3</sub> | Fe <sub>2</sub> O <sub>3</sub> |
|------------------------------|---------------------|----------------|--------------------------------|--------------------------------|--------------------------------|-----------------|--------------------------------|--------------------------------|
| $\mu_m$ (cm <sup>2</sup> /g) | 0.1                 | 20             | 0.64220                        | 0.68120                        | 0.66690                        | 0.84760         | 1.17000                        | 0.19890                        |
|                              |                     | 40             | 1.11300                        | 1.19000                        | 1.16200                        | 1.52300         | 2.16800                        | 0.22580                        |
|                              |                     | 60             | 1.58300                        | 1.70000                        | 1.65700                        | 2.19900         | 3.16600                        | 0.25270                        |
|                              | 0.5                 | 20             | 0.10120                        | 0.10170                        | 0.10160                        | 0.10500         | 0.11110                        | 0.09659                        |
|                              |                     | 40             | 0.10290                        | 0.10380                        | 0.10380                        | 0.11060         | 0.12270                        | 0.09372                        |
|                              |                     | 60             | 0.10450                        | 0.10600                        | 0.10590                        | 0.11620         | 0.13430                        | 0.09084                        |
|                              | 1.0                 | 20             | 0.07039                        | 0.07041                        | 0.07052                        | 0.07123         | 0.07235                        | 0.07032                        |
|                              |                     | 40             | 0.06815                        | 0.06819                        | 0.06842                        | 0.06984         | 0.07208                        | 0.06801                        |
|                              |                     | 60             | 0.06591                        | 0.06597                        | 0.06632                        | 0.06845         | 0.07181                        | 0.06570                        |
|                              | 5.0                 | 20             | 0.03173                        | 0.03176                        | 0.03183                        | 0.03202         | 0.03267                        | 0.03043                        |
|                              |                     | 40             | 0.03302                        | 0.03308                        | 0.03320                        | 0.03358         | 0.03490                        | 0.03041                        |
|                              |                     | 60             | 0.03431                        | 0.03440                        | 0.03458                        | 0.03515         | 0.03713                        | 0.03039                        |
| $\mu$ (cm <sup>-1</sup> )    | 0.1                 | 20             | 0.74152                        | 0.78380                        | 0.76732                        | 0.97421         | 1.35326                        | 0.22595                        |
|                              |                     | 40             | 1.63801                        | 1.73581                        | 1.69478                        | 2.21545         | 3.20462                        | 0.31896                        |
|                              |                     | 60             | 3.21155                        | 3.38629                        | 3.29992                        | 4.35574         | 6.48148                        | 0.47185                        |
|                              | 0.5                 | 20             | 0.11685                        | 0.11702                        | 0.11690                        | 0.12068         | 0.12850                        | 0.10973                        |
|                              |                     | 40             | 0.15144                        | 0.15141                        | 0.15139                        | 0.16089         | 0.18137                        | 0.13239                        |
|                              |                     | 60             | 0.21201                        | 0.21115                        | 0.21090                        | 0.23017         | 0.27494                        | 0.16962                        |
|                              | 1.0                 | 20             | 0.08128                        | 0.08102                        | 0.08114                        | 0.08187         | 0.08368                        | 0.07988                        |
|                              |                     | 40             | 0.10030                        | 0.09947                        | 0.09979                        | 0.10159         | 0.10654                        | 0.09607                        |
|                              |                     | 60             | 0.13372                        | 0.13141                        | 0.13208                        | 0.13558         | 0.14701                        | 0.12268                        |
|                              | 5.0                 | 20             | 0.03664                        | 0.03654                        | 0.03662                        | 0.03680         | 0.03779                        | 0.03457                        |
|                              |                     | 40             | 0.04860                        | 0.04825                        | 0.04842                        | 0.04885         | 0.05159                        | 0.04296                        |
|                              |                     | 60             | 0.06961                        | 0.06852                        | 0.06887                        | 0.06962         | 0.07601                        | 0.05674                        |
| HVL (cm)                     | 0.1                 | 20             | 0.93476                        | 0.88434                        | 0.90334                        | 0.71150         | 0.51220                        | 3.06767                        |
|                              |                     | 40             | 0.42316                        | 0.39932                        | 0.40899                        | 0.31287         | 0.21630                        | 2.17311                        |
|                              |                     | 60             | 0.21583                        | 0.20469                        | 0.21005                        | 0.15913         | 0.10694                        | 1.46901                        |
|                              | 0.5                 | 20             | 5.93187                        | 5.92342                        | 5.92949                        | 5.74347         | 5.39405                        | 6.31700                        |
|                              |                     | 40             | 4.57708                        | 4.57798                        | 4.57846                        | 4.30832         | 3.82176                        | 5.23569                        |
|                              |                     | 60             | 3.26946                        | 3.28280                        | 3.28662                        | 3.01150         | 2.52108                        | 4.08652                        |
|                              | 1.0                 | 20             | 8.52827                        | 8.55576                        | 8.54278                        | 8.46644         | 8.28306                        | 8.67689                        |
|                              |                     | 40             | 6.91096                        | 6.96868                        | 6.94599                        | 6.82274         | 6.50569                        | 7.21496                        |
|                              |                     | 60             | 5.18371                        | 5.27477                        | 5.24808                        | 5.11229         | 4.71495                        | 5.65022                        |
|                              | 5.0                 | 20             | 18.91917                       | 18.96761                       | 18.92669                       | 18.83400        | 18.34341                       | 20.05123                       |
|                              |                     | 40             | 14.26353                       | 14.36499                       | 14.31460                       | 14.19001        | 13.43639                       | 16.13578                       |
|                              |                     | 60             | 9.95798                        | 10.11560                       | 10.06514                       | 9.95552         | 9.11878                        | 12.21518                       |
